# Supplementary material
Source: publisher site journal article supplement (https://www.dovepress.com/article/493889)
Supplement: Supplementary file 1 [file get_supplementary_file.php]

**Supplementary Table 1 Population information of GSE1919 dataset**

| Accession | Title | Source name | Age | Gender | Treatment protocol | Growth protocol |
| --- | --- | --- | --- | --- | --- | --- |
| GSM34379 | ND_1 | normal donor | 69 | female | no treatment | synovectomy |
| GSM34383 | ND_2 | normal donor | 58 | male | no treatment | synovectomy |
| GSM34385 | ND_3 | normal donor | 32 | female | no treatment | synovectomy |
| GSM34388 | ND_4 | normal donor | 46 | male | no treatment | synovectomy |
| GSM34391 | ND_5 | normal donor | 58 | male | no treatment | synovectomy |
| GSM34393 | OA_A | osteoarthritis | 60 | female | non-steroidal anti-inflammatory drugs (NSAID) | synovectomy |
| GSM34394 | OA_B | osteoarthritis | 58 | female | non-steroidal anti-inflammatory drugs (NSAID) | synovectomy |
| GSM34395 | OA_x | osteoarthritis | 86 | female | non-steroidal anti-inflammatory drugs (NSAID) | synovectomy |
| GSM34396 | OA_y | osteoarthritis | 69 | female | non-steroidal anti-inflammatory drugs (NSAID) | synovectomy |
| GSM34397 | OA_z | osteoarthritis | 68 | female | no treatment | synovectomy |

**Supplementary Table 2 Population information of RT-qPCR patients**

| Group | ID | Age | Gender | BMI | Growth protocol |
| --- | --- | --- | --- | --- | --- |
| normal | K003 | 69 | female | 22.6 | synovectomy |
| normal | K006 | 58 | male | 24.3 | synovectomy |
| normal | K007 | 32 | female | 26.3 | synovectomy |
| normal | K009 | 46 | male | 24.1 | synovectomy |
| normal | K010 | 58 | female | 25.5 | synovectomy |
| osteoarthritis | K001 | 60 | female | 25.3 | synovectomy |
| osteoarthritis | K002 | 58 | female | 26.5 | synovectomy |
| osteoarthritis | K004 | 86 | male | 27.3 | synovectomy |
| osteoarthritis | K005 | 69 | female | 24.5 | synovectomy |
| osteoarthritis | K008 | 68 | female | 24.7 | synovectomy |

**Supplementary Table 3. Related primer sequences**

| **Primer** | **Sequences** | |
| --- | --- | --- |
| col3a1 F | CCCCAGGACTTAGAGGTGGA | |
| col3a1 R | CACCCTTGTCACCCTTTGGA | |
| olr1 F | CAAGACTGGATCTGGCATGGA |
| olr1 R | TGAAGTCCTGTGGGGAGTAATG |
| stc1 F | AGCTGCCCAATCACTTCTCC |
| stc1 R | CTCATTGGTGCGTCTCCTGT |
| KCNJ8 F | GTGGCTAAGCTGGCTATGGT |
| KCNJ8 R | AGCACATACTCCTCCGGGAT |
| Reference H-GAPDH F | CGAAGGTGGAGTCAACGGATTT |
| Reference H-GAPDH R | ATGGGTGGAATCATATTGGAAC |
